# Supplementary figures and images for: Association between Tumor Mutational Burden, Stromal CD8+ Tumor-Infiltrating Lymphocytes, and Clinical Factors in Cervical Cancers Treated with Radiotherapy
Source: MDPI journal article supplement (doi:10.3390/cancers15041210), 2023-02-14

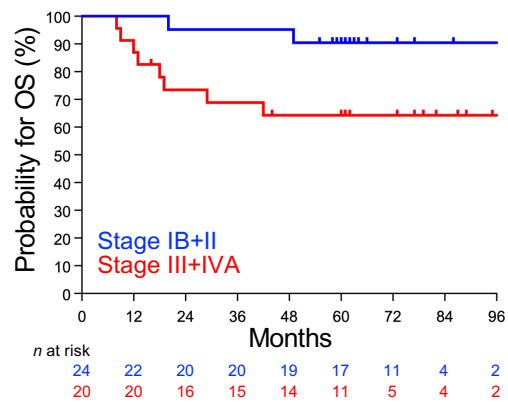

**Supplementary Figure S1. Kaplan–Meier estimates for OS, stratified by FIGO staging.**

Supplement: s1 [file s1]
